# Supplementary material for: Identifying New Candidate Genes and Chemicals Related to Prostate Cancer Using a Hybrid Network and Shortest Path Approach
Source: Hindawi journal article supplement (doi:10.1155/2015/462363), 2015-01-01
Supplement: f1 [file 462363.f1.zip]

**Supplementary Material II.** Candidate genes and chemicals, their betweenness and p-values

| <b>Chemical or gene ID</b> | <b>Chemical or gene name</b> | <b>Betweenness</b> | <b>P-value</b> |
|----------------------------|------------------------------|--------------------|----------------|
| CID0000000051              | alpha-ketoglutarate          | 326                | 0.844          |
| CID0000000177              | acetaldehyde                 | 3                  | 0.854          |
| CID0000000190              | adenine                      | 1                  | 0.987          |
| CID0000000222              | ammonia                      | 4                  | 0.884          |
| CID0000000259              | bromide                      | 363                | 0.002          |
| CID0000000271              | calcium                      | 9377               | 0.936          |
| CID0000000281              | carbon monoxide              | 342                | 0.287          |
| CID0000000283              | formate                      | 344                | 0.851          |
| CID0000000305              | choline                      | 725                | 0.685          |
| CID0000000311              | citric acid                  | 363                | 0.186          |
| CID0000000312              | chloride                     | 2338               | 0.286          |
| CID0000000679              | DMSO                         | 76                 | 0.586          |
| CID0000000681              | dopamine                     | 23                 | 0.967          |
| CID0000000712              | formalin                     | 361                | 0.159          |
| CID0000000750              | glycine                      | 369                | 0.662          |
| CID0000000753              | glycerol                     | 1713               | 0.967          |
| CID0000000774              | histamine                    | 524                | 0.834          |
| CID0000000784              | H2O2                         | 721                | 0.227          |
| CID0000000813              | potassium                    | 85                 | 0.578          |

|              |                        |      |       |
|--------------|------------------------|------|-------|
| CID000000888 | magnesium              | 1219 | 0.991 |
| CID000000903 | N-acetylserotonin      | 3    | 0.159 |
| CID000000923 | sodium                 | 595  | 0.992 |
| CID000000961 | hydroxyl radicals      | 47   | 1     |
| CID000000977 | oxygen                 | 2648 | 0.94  |
| CID000000985 | palmitate              | 363  | 0.601 |
| CID000000991 | parathion              | 362  | 0.737 |
| CID000001051 | pyridoxal 5'-phosphate | 364  | 0.679 |
| CID000001135 | thymine                | 1    | 0.121 |
| CID000001567 | 2-mercaptoethanol      | 4    | 0.345 |
| CID000001935 | tacrine                | 302  | 0.126 |
| CID000001983 | acetaminophen          | 1    | 0.158 |
| CID000002519 | caffeine               | 371  | 0.028 |
| CID000002520 | verapamil              | 63   | 0.13  |
| CID000002769 | cisapride              | 4    | 0.811 |
| CID000002818 | clozapine              | 14   | 0.699 |
| CID000003032 | diclofenac             | 398  | 0.065 |
| CID000003715 | indomethacin           | 868  | 0.084 |
| CID000003776 | isopropanol            | 3    | 0.056 |
| CID000003779 | isoproterenol          | 1    | 0.916 |
| CID000004114 | 8-MOP                  | 2    | 0.466 |
| CID000004585 | olanzapine             | 2    | 0.959 |

|              |                         |       |       |
|--------------|-------------------------|-------|-------|
| CID000004636 | oxymetazoline           | 14    | 0.001 |
| CID000004763 | phenobarbital           | 22    | 0.668 |
| CID000004893 | prazosin                | 2     | 0.09  |
| CID000005202 | serotonin               | 18    | 0.917 |
| CID000005566 | trifluoperazine         | 363   | 0.001 |
| CID000005789 | thymidine               | 7     | 0.129 |
| CID000005815 | epinephrine             | 260   | 0.05  |
| CID000005833 | spironolactone          | 24    | 0.079 |
| CID000005885 | NADP                    | 1179  | 0.772 |
| CID000005892 | beta-NAD                | 1234  | 0.701 |
| CID000005950 | L-alanine               | 17    | 0.537 |
| CID000005951 | L-serine                | 363   | 0.074 |
| CID000005957 | adenosine triphosphate  | 14668 | 1     |
| CID000005960 | L-aspartate             | 363   | 0.011 |
| CID000005961 | glutamine               | 355   | 0.205 |
| CID000005962 | lysine                  | 23    | 0.733 |
| CID000005997 | cholesterol             | 359   | 0.846 |
| CID000006022 | adenosine diphosphate   | 1757  | 0.145 |
| CID000006031 | uridine diphosphate     | 4     | 0.979 |
| CID000006076 | cyclic AMP              | 363   | 0.319 |
| CID000006083 | adenosine monophosphate | 360   | 0.71  |
| CID000006106 | L-leucine               | 363   | 0.057 |

|              |                        |      |       |
|--------------|------------------------|------|-------|
| CID000006134 | lactose                | 17   | 0.099 |
| CID000006137 | L-methionine           | 1    | 0.414 |
| CID000006140 | phenylalanine          | 25   | 0.249 |
| CID000006176 | cytidine triphosphate  | 50   | 0.119 |
| CID000006322 | arginine               | 210  | 0.82  |
| CID000006503 | tris                   | 1083 | 0.011 |
| CID000006804 | 5'-GMP                 | 363  | 0.129 |
| CID000006830 | guanosine triphosphate | 1435 | 0.999 |
| CID000008977 | guanosine diphosphate  | 100  | 0.998 |
| CID000023925 | Fe(III)                | 2089 | 0.223 |
| CID000023930 | manganese              | 23   | 0.931 |
| CID000024139 | chitin                 | 1    | 0.962 |
| CID000030323 | anthracycline          | 3    | 0.124 |
| CID000033032 | glutamic acid          | 1081 | 0.132 |
| CID000054687 | pravastatin            | 349  | 0.206 |
| CID000060662 | mibefradil             | 363  | 0.013 |
| CID000060699 | topotecan              | 174  | 0.06  |
| CID000060961 | adenosine              | 347  | 0.641 |
| CID000064689 | D-glucose              | 265  | 0.736 |
| CID000065036 | allicin                | 2    | 0.024 |
| CID000065063 | dUMP                   | 6    | 0.479 |
| CID000066370 | alpha-D-glucose        | 1    | 0.72  |

|                 |                             |      |       |
|-----------------|-----------------------------|------|-------|
| CID000072886    | L-cysteate                  | 363  | 0.064 |
| CID000087642    | coenzyme A                  | 111  | 0.987 |
| CID000119400    | tartrate                    | 363  | 0.005 |
| CID000124886    | Glutathione                 | 9    | 0.459 |
| CID000145742    | L-proline                   | 4    | 0.236 |
| CID000157350    | hydroxyl radical            | 362  | 0.005 |
| CID000161930    | icilin                      | 363  | 0     |
| CID000439155    | AdoHcy                      | 11   | 0.99  |
| CID000439260    | norepinephrine              | 918  | 0.11  |
| CID000439353    | galactose                   | 346  | 0.38  |
| CID000444795    | retinoic acid               | 374  | 0.314 |
| CID000444899    | arachidonic acid            | 497  | 0.477 |
| CID000520535    | superoxide                  | 362  | 0.099 |
| CID000638015    | 11-cis-retinal              | 359  | 0.08  |
| CID000643975    | flavin adenine dinucleotide | 378  | 0.299 |
| CID005280360    | PGE2                        | 50   | 0.518 |
| CID005280489    | beta-carotene               | 363  | 0.173 |
| ENSP00000003084 | CFTR                        | 5392 | 1     |
| ENSP00000005257 | RALA                        | 362  | 0.116 |
| ENSP00000006053 | CX3CL1                      | 363  | 0.001 |
| ENSP00000008527 | CRY1                        | 363  | 0.012 |
| ENSP00000010338 | TRAF3IP3                    | 363  | 0.017 |

|                 |          |       |       |
|-----------------|----------|-------|-------|
| ENSP00000011653 | CD4      | 123   | 0.721 |
| ENSP00000046794 | LCP2     | 22    | 0.808 |
| ENSP00000156109 | GPKOW    | 1     | 0.195 |
| ENSP00000160373 | CTTNBP2  | 86    | 0.028 |
| ENSP00000162330 | BCAR1    | 111   | 0.905 |
| ENSP00000162749 | TNFRSF1A | 1253  | 0.003 |
| ENSP00000170630 | IL4R     | 7     | 0.47  |
| ENSP00000173229 | NTN1     | 365   | 0.042 |
| ENSP00000196551 | RPS5     | 363   | 0.011 |
| ENSP00000206249 | ESR1     | 11815 | 0.001 |
| ENSP00000209728 | CDC6     | 186   | 0.472 |
| ENSP00000212015 | SIRT1    | 92    | 0.177 |
| ENSP00000212355 | TGFBR3   | 362   | 0.006 |
| ENSP00000215479 | AMELY    | 363   | 0     |
| ENSP00000215587 | POLR2E   | 5     | 0.541 |
| ENSP00000215829 | SNRPD3   | 72    | 0.977 |
| ENSP00000215832 | MAPK1    | 696   | 0.309 |
| ENSP00000215909 | LGALS1   | 14    | 0.172 |
| ENSP00000216117 | HMOX1    | 363   | 0.072 |
| ENSP00000216223 | IL2RB    | 12    | 0.357 |
| ENSP00000216225 | RBX1     | 74    | 0.799 |
| ENSP00000216554 | EIF5     | 363   | 0.011 |

|                 |            |      |       |
|-----------------|------------|------|-------|
| ENSP00000216797 | NFKBIA     | 178  | 0.275 |
| ENSP00000216862 | CYP24A1    | 36   | 0     |
| ENSP00000216911 | AURKA      | 363  | 0.095 |
| ENSP00000217244 | CSNK2A1    | 362  | 0.316 |
| ENSP00000219070 | MMP2       | 363  | 0.052 |
| ENSP00000219476 | TSC2       | 466  | 0.069 |
| ENSP00000221494 | SF3A2      | 744  | 0.695 |
| ENSP00000221930 | TGFB1      | 1003 | 0.046 |
| ENSP00000221957 | PLIN3      | 363  | 0.001 |
| ENSP00000222005 | CDC37      | 497  | 0.108 |
| ENSP00000222254 | PIK3R2     | 5    | 0.036 |
| ENSP00000223023 | WASL       | 48   | 0.985 |
| ENSP00000223129 | RPA3       | 191  | 0.148 |
| ENSP00000223321 | PSMA2      | 251  | 0.236 |
| ENSP00000224181 | C8G        | 363  | 0.003 |
| ENSP00000225831 | CCL2       | 363  | 0.009 |
| ENSP00000225983 | HDAC5      | 1    | 0.105 |
| ENSP00000226218 | VTN, SEBOX | 4    | 0.689 |
| ENSP00000226413 | GNRHR      | 363  | 0     |
| ENSP00000226574 | NFKB1      | 363  | 0.011 |
| ENSP00000226730 | IL2        | 19   | 0.181 |
| ENSP00000227378 | HSPA8      | 224  | 0.816 |

|                 |        |      |       |
|-----------------|--------|------|-------|
| ENSP00000227507 | CCND1  | 2792 | 0.005 |
| ENSP00000227758 | BIRC2  | 1583 | 0     |
| ENSP00000228307 | PXN    | 112  | 0.62  |
| ENSP00000228682 | GLI1   | 358  | 0.041 |
| ENSP00000228837 | FGF6   | 1074 | 0.003 |
| ENSP00000228872 | CDKN1B | 54   | 0.71  |
| ENSP00000228916 | SCNN1A | 258  | 0.184 |
| ENSP00000229022 | VDR    | 1147 | 0.02  |
| ENSP00000229769 | FANCE  | 3    | 0.356 |
| ENSP00000229794 | MAPK14 | 748  | 0.031 |
| ENSP00000230449 | EXOC2  | 363  | 0.058 |
| ENSP00000231487 | SKP1   | 191  | 0.651 |
| ENSP00000231509 | NR3C1  | 2957 | 0.001 |
| ENSP00000232014 | BCL6   | 3    | 0.211 |
| ENSP00000233242 | APOB   | 5    | 0.407 |
| ENSP00000233946 | IL1R1  | 1    | 0.336 |
| ENSP00000234111 | ODC1   | 1    | 0.928 |
| ENSP00000234310 | PPP3R1 | 363  | 0.003 |
| ENSP00000235090 | WDR77  | 702  | 0.295 |
| ENSP00000236850 | APOA1  | 6    | 0.837 |
| ENSP00000237612 | ABCG2  | 376  | 0.048 |
| ENSP00000239223 | DUSP1  | 119  | 0.132 |



|                 |         |      |       |
|-----------------|---------|------|-------|
| ENSP00000240185 | TARDBP  | 10   | 0.996 |
| ENSP00000241337 | GSTM2   | 2    | 0.037 |
| ENSP00000242057 | AHR     | 361  | 0.585 |
| ENSP00000242577 | DYNLL1  | 363  | 0.355 |
| ENSP00000244007 | PLCG1   | 2110 | 0     |
| ENSP00000245323 | EFNB2   | 364  | 0.01  |
| ENSP00000245457 | PTGER2  | 4    | 0.049 |
| ENSP00000245541 | GGA3    | 564  | 0.022 |
| ENSP00000245544 | NUP85   | 362  | 0.011 |
| ENSP00000245960 | CDC25B  | 63   | 0.516 |
| ENSP00000247161 | ELK1    | 121  | 0.093 |
| ENSP00000247668 | TRAF2   | 1898 | 0.01  |
| ENSP00000248553 | HSPB1   | 363  | 0.048 |
| ENSP00000248566 | SHFM1   | 45   | 0.979 |
| ENSP00000249071 | RAC2    | 102  | 0.652 |
| ENSP00000249299 | NAA38   | 17   | 0.498 |
| ENSP00000250495 | NEDD8   | 433  | 0.054 |
| ENSP00000251810 | RRM2B   | 343  | 0.032 |
| ENSP00000251849 | RAF1    | 2652 | 0.35  |
| ENSP00000251968 | TSG101  | 363  | 0.218 |
| ENSP00000252029 | TYMP    | 9    | 0.097 |
| ENSP00000252506 | GADD45G | 8    | 0.01  |

|                 |         |      |       |
|-----------------|---------|------|-------|
| ENSP00000252622 | LSM7    | 2    | 1     |
| ENSP00000252945 | CYP2E1  | 4    | 0.615 |
| ENSP00000252997 | GATA5   | 40   | 0.049 |
| ENSP00000254066 | RARA    | 1218 | 0.042 |
| ENSP00000254122 | FSHB    | 363  | 0.03  |
| ENSP00000254227 | NR0B2   | 363  | 0.106 |
| ENSP00000254301 | LGALS3  | 3    | 0.062 |
| ENSP00000254657 | PER2    | 363  | 0.023 |
| ENSP00000254719 | RPA1    | 191  | 0.252 |
| ENSP00000254942 | TERF2   | 277  | 0.397 |
| ENSP00000256216 | HSD17B4 | 363  | 0.003 |
| ENSP00000256383 | EIF2S1  | 359  | 0.236 |
| ENSP00000256442 | CCNB1   | 2418 | 0.469 |
| ENSP00000256474 | VHL     | 786  | 0.741 |
| ENSP00000256857 | GRP     | 2    | 0.612 |
| ENSP00000256958 | SLCO1B1 | 357  | 0.195 |
| ENSP00000256996 | DDB2    | 13   | 0.222 |
| ENSP00000258418 | CAB39   | 362  | 0.021 |
| ENSP00000258743 | IL6     | 361  | 0.158 |
| ENSP00000258962 | SRSF1   | 16   | 0.721 |
| ENSP00000259808 | RIPK1   | 328  | 0.294 |
| ENSP00000260010 | TLR2    | 1    | 0.14  |

|                 |          |      |       |
|-----------------|----------|------|-------|
| ENSP00000260433 | CYP19A1  | 1426 | 0.011 |
| ENSP00000260682 | CYP2C9   | 363  | 0.119 |
| ENSP00000260762 | EXOC6    | 1    | 0.325 |
| ENSP00000261023 | ITGAV    | 3    | 0.801 |
| ENSP00000261349 | LRP6     | 1086 | 0.011 |
| ENSP00000261366 | LMNB1    | 363  | 0.048 |
| ENSP00000261461 | PPP2R5A  | 86   | 0.355 |
| ENSP00000261733 | ALDH2    | 363  | 0.017 |
| ENSP00000261769 | CDH1     | 364  | 0.164 |
| ENSP00000261799 | PDGFRB   | 844  | 0.003 |
| ENSP00000261908 | NEO1     | 4    | 0.067 |
| ENSP00000262053 | ATF1     | 362  | 0.002 |
| ENSP00000262160 | SMAD2    | 842  | 0.118 |
| ENSP00000262209 | TRPA1    | 363  | 0.022 |
| ENSP00000262238 | YY1      | 363  | 0.15  |
| ENSP00000262320 | AXIN1    | 1874 | 0.031 |
| ENSP00000262367 | CREBBP   | 3569 | 0     |
| ENSP00000262435 | SMURF2   | 15   | 0.067 |
| ENSP00000262477 | RABEP1   | 363  | 0.189 |
| ENSP00000262613 | SLC9A3R1 | 118  | 0.811 |
| ENSP00000262629 | TYROBP   | 316  | 0.599 |
| ENSP00000262643 | CCNE1    | 110  | 0.717 |

|                 |        |      |       |
|-----------------|--------|------|-------|
| ENSP00000262768 | TIMP2  | 9    | 0.211 |
| ENSP00000262803 | UPF1   | 8    | 0.882 |
| ENSP00000262809 | ELL    | 363  | 0     |
| ENSP00000263025 | MAPK3  | 357  | 0.024 |
| ENSP00000263125 | PRKCQ  | 363  | 0.001 |
| ENSP00000263126 | AKR1C4 | 363  | 0     |
| ENSP00000263253 | EP300  | 1743 | 0.315 |
| ENSP00000263277 | EHD2   | 363  | 0     |
| ENSP00000263408 | C9     | 363  | 0     |
| ENSP00000263734 | EPAS1  | 3    | 0.802 |
| ENSP00000263753 | SGOL1  | 221  | 0.817 |
| ENSP00000263915 | GRB14  | 1    | 0.001 |
| ENSP00000263918 | STRN   | 10   | 0.049 |
| ENSP00000263923 | KDR    | 2    | 0.305 |
| ENSP00000263946 | PKP1   | 1    | 0     |
| ENSP00000263967 | PIK3CA | 583  | 0.911 |
| ENSP00000264001 | CKLF   | 363  | 0     |
| ENSP00000264033 | CBL    | 3418 | 0.624 |
| ENSP00000264110 | ATF2   | 459  | 0.047 |
| ENSP00000264156 | MCM6   | 6    | 0.097 |
| ENSP00000264246 | CD80   | 102  | 0.306 |
| ENSP00000264381 | BCHE   | 738  | 0.651 |

|                 |         |      |       |
|-----------------|---------|------|-------|
| ENSP00000264708 | POMC    | 705  | 0.275 |
| ENSP00000264832 | ICAM1   | 363  | 0.035 |
| ENSP00000264998 | TF      | 2    | 0.628 |
| ENSP00000265171 | EGF     | 82   | 0.322 |
| ENSP00000265335 | RAD50   | 266  | 0.433 |
| ENSP00000265354 | SRF     | 719  | 0.069 |
| ENSP00000265717 | PRKAR2B | 363  | 0.081 |
| ENSP00000265724 | ABCB1   | 389  | 0.077 |
| ENSP00000265734 | CDK6    | 363  | 0.014 |
| ENSP00000265965 | SERGEF  | 363  | 0     |
| ENSP00000266000 | DAXX    | 7    | 0.381 |
| ENSP00000266970 | CDK2    | 813  | 0.627 |
| ENSP00000267082 | ITGB7   | 233  | 0.027 |
| ENSP00000267101 | ERBB3   | 6    | 0.486 |
| ENSP00000267415 | TINF2   | 277  | 0.159 |
| ENSP00000267430 | FANCM   | 3    | 0.235 |
| ENSP00000267868 | RAD51   | 329  | 0.322 |
| ENSP00000268035 | IGF1R   | 180  | 0.869 |
| ENSP00000268182 | IQGAP1  | 1    | 0.983 |
| ENSP00000268712 | NCOR1   | 216  | 0.252 |
| ENSP00000269141 | CDH2    | 2217 | 0.023 |
| ENSP00000269260 | ARRB2   | 360  | 0.41  |

|                 |           |      |       |
|-----------------|-----------|------|-------|
| ENSP00000269321 | ARHGDIA   | 163  | 0.44  |
| ENSP00000269349 | EIF4A3    | 12   | 0.852 |
| ENSP00000269397 | CBX4      | 362  | 0.166 |
| ENSP00000269571 | ERBB2     | 882  | 0.284 |
| ENSP00000270202 | AKT1      | 3084 | 0.205 |
| ENSP00000271628 | SF3B4     | 5    | 0.307 |
| ENSP00000272190 | REN       | 804  | 0.029 |
| ENSP00000272298 | CALM2     | 358  | 0.031 |
| ENSP00000273047 | RAB5A     | 363  | 0.037 |
| ENSP00000274026 | CCNA2     | 842  | 0.867 |
| ENSP00000274335 | PIK3R1    | 249  | 0.965 |
| ENSP00000274376 | RASA1     | 856  | 0.006 |
| ENSP00000276198 | HTR2C     | 8    | 0.624 |
| ENSP00000276201 | UPF3B     | 9    | 0.983 |
| ENSP00000276414 | GNRH1     | 363  | 0.031 |
| ENSP00000276431 | TNFRSF10B | 11   | 0     |
| ENSP00000276571 | CRH       | 360  | 0.256 |
| ENSP00000276603 | TERF1     | 363  | 0.016 |
| ENSP00000277541 | NOTCH1    | 116  | 0.875 |
| ENSP00000278568 | PAK1      | 1    | 0.993 |
| ENSP00000278616 | ATM       | 370  | 0.538 |
| ENSP00000278916 | CHEK1     | 11   | 0.626 |

|                 |         |      |       |
|-----------------|---------|------|-------|
| ENSP00000279488 | DUSP6   | 9    | 0.029 |
| ENSP00000280097 | HNMT    | 284  | 0.188 |
| ENSP00000280155 | ADRA2A  | 4    | 0.29  |
| ENSP00000280193 | VEGFC   | 1    | 0.057 |
| ENSP00000280892 | EIF4E   | 720  | 0.182 |
| ENSP00000281623 | FBXO4   | 86   | 0.031 |
| ENSP00000281708 | FBXW7   | 13   | 0.838 |
| ENSP00000281821 | EPHA4   | 2    | 0.055 |
| ENSP00000282091 | PTH     | 327  | 0.211 |
| ENSP00000282441 | YAP1    | 362  | 0.113 |
| ENSP00000282561 | GJA1    | 20   | 0.673 |
| ENSP00000283635 | CD8A    | 13   | 0.047 |
| ENSP00000284384 | PRKCA   | 230  | 0.127 |
| ENSP00000284523 | WNT3A   | 725  | 0.007 |
| ENSP00000284811 | TCEB1   | 1    | 0.802 |
| ENSP00000284957 | RABGEF1 | 359  | 0.233 |
| ENSP00000284981 | APP     | 361  | 0.51  |
| ENSP00000286627 | KCNMA1  | 363  | 0.009 |
| ENSP00000286648 | DCK     | 88   | 0.104 |
| ENSP00000287598 | BUB1B   | 562  | 0.682 |
| ENSP00000287641 | SST     | 1085 | 0     |
| ENSP00000287647 | FANCD2  | 5    | 0.613 |

|                 |        |     |       |
|-----------------|--------|-----|-------|
| ENSP00000287727 | ZFYVE9 | 362 | 0.139 |
| ENSP00000287820 | PPARG  | 808 | 0.419 |
| ENSP00000287936 | HMGCR  | 706 | 0.84  |
| ENSP00000288422 | TAB3   | 363 | 0     |
| ENSP00000288986 | NCK1   | 1   | 0.993 |
| ENSP00000290330 | SNF8   | 363 | 0.001 |
| ENSP00000290921 | CTBP1  | 362 | 0.289 |
| ENSP00000291552 | U2AF1  | 7   | 0.824 |
| ENSP00000292303 | CCR5   | 123 | 0.409 |
| ENSP00000292644 | PSMC2  | 326 | 0.994 |
| ENSP00000293288 | BAX    | 180 | 0.149 |
| ENSP00000293308 | KRT8   | 363 | 0     |
| ENSP00000293379 | ITGA5  | 649 | 0.308 |
| ENSP00000293549 | WNT1   | 363 | 0.006 |
| ENSP00000294172 | NXF1   | 362 | 0.52  |
| ENSP00000294304 | LRP5   | 363 | 0.004 |
| ENSP00000294954 | LHCGR  | 363 | 0     |
| ENSP00000295408 | MERTK  | 724 | 0     |
| ENSP00000295600 | MITF   | 363 | 0     |
| ENSP00000295731 | IHH    | 3   | 0.059 |
| ENSP00000295897 | ALB    | 66  | 0.779 |
| ENSP00000296181 | ITGB5  | 1   | 0.037 |



|                 |        |      |       |
|-----------------|--------|------|-------|
| ENSP00000296575 | HHIP   | 3    | 0.026 |
| ENSP00000296581 | LSM6   | 4    | 0.149 |
| ENSP00000296585 | ITGA2  | 36   | 0.749 |
| ENSP00000296930 | NPM1   | 1082 | 0.083 |
| ENSP00000297494 | NOS3   | 419  | 0.599 |
| ENSP00000298139 | WRN    | 11   | 0.412 |
| ENSP00000298316 | ARF6   | 1    | 0.61  |
| ENSP00000298772 | TRIM13 | 363  | 0     |
| ENSP00000299402 | APBB1  | 150  | 0.625 |
| ENSP00000299421 | ILK    | 15   | 0.454 |
| ENSP00000299543 | CTDP1  | 4    | 0.966 |
| ENSP00000300093 | PLK1   | 242  | 0.961 |
| ENSP00000300134 | STAT6  | 382  | 0.077 |
| ENSP00000300161 | YWHAB  | 194  | 0.318 |
| ENSP00000300413 | SNRPD1 | 363  | 0.09  |
| ENSP00000300574 | CRK    | 227  | 0.338 |
| ENSP00000300651 | MED1   | 17   | 0.957 |
| ENSP00000300738 | RRM1   | 363  | 0.008 |
| ENSP00000300935 | RAB8A  | 1    | 0.273 |
| ENSP00000301019 | CDT1   | 11   | 0.459 |
| ENSP00000301141 | CYP2A6 | 2    | 0.592 |
| ENSP00000301633 | BIRC5  | 7    | 0.648 |

|                 |         |     |       |
|-----------------|---------|-----|-------|
| ENSP00000301764 | DDB1    | 13  | 0.555 |
| ENSP00000301838 | FADD    | 5   | 0.311 |
| ENSP00000302150 | PRL     | 4   | 0.3   |
| ENSP00000302486 | MAP2K1  | 623 | 0.197 |
| ENSP00000302530 | BUB1    | 169 | 0.927 |
| ENSP00000302564 | BCL2L1  | 377 | 0.077 |
| ENSP00000302665 | IGF1    | 6   | 0.926 |
| ENSP00000302811 | MTNR1A  | 4   | 0.146 |
| ENSP00000302955 | RRM2    | 65  | 0.085 |
| ENSP00000302967 | HDAC3   | 13  | 0.643 |
| ENSP00000303242 | ITGB2   | 361 | 0.221 |
| ENSP00000303706 | CDC25A  | 3   | 0.293 |
| ENSP00000303830 | INSR    | 252 | 0.918 |
| ENSP00000303939 | CTLA4   | 307 | 0.286 |
| ENSP00000304236 | CD14    | 1   | 0.028 |
| ENSP00000304895 | IRS1    | 429 | 0.748 |
| ENSP00000305372 | ADRB2   | 915 | 0.5   |
| ENSP00000305769 | SMAD1   | 5   | 0.08  |
| ENSP00000306245 | FOS     | 911 | 0.606 |
| ENSP00000306512 | IL8     | 363 | 0.135 |
| ENSP00000307235 | EIF2AK3 | 345 | 0.162 |
| ENSP00000307288 | MCM7    | 42  | 0.247 |

|                 |        |      |       |
|-----------------|--------|------|-------|
| ENSP00000307863 | U2AF2  | 645  | 0.814 |
| ENSP00000308450 | CDC20  | 205  | 0.707 |
| ENSP00000308741 | CLOCK  | 363  | 0.013 |
| ENSP00000308938 | PLG    | 3    | 0.899 |
| ENSP00000309103 | BAD    | 135  | 0.097 |
| ENSP00000309503 | YWHAZ  | 325  | 0.461 |
| ENSP00000309572 | TERT   | 373  | 0.013 |
| ENSP00000309845 | HRAS   | 4247 | 0.455 |
| ENSP00000310127 | IRF3   | 748  | 0.003 |
| ENSP00000310596 | LSM1   | 11   | 0.759 |
| ENSP00000311032 | CASP3  | 2098 | 0.001 |
| ENSP00000311113 | JUP    | 423  | 0.102 |
| ENSP00000311430 | RPL4   | 1    | 0.088 |
| ENSP00000311469 | GSTM1  | 7    | 0.124 |
| ENSP00000311502 | HEG1   | 362  | 0.003 |
| ENSP00000311579 | TNKS   | 363  | 0     |
| ENSP00000311677 | PPP1R8 | 1    | 0.67  |
| ENSP00000312652 | LEP    | 220  | 0.514 |
| ENSP00000312735 | POLR2B | 9    | 0.919 |
| ENSP00000312987 | HNF4A  | 1    | 0.035 |
| ENSP00000312995 | CLSPN  | 4    | 0.69  |
| ENSP00000313199 | HNRNPD | 333  | 0.159 |

|                 |         |      |       |
|-----------------|---------|------|-------|
| ENSP00000313420 | PRKDC   | 356  | 0.408 |
| ENSP00000313829 | KHDRBS1 | 1090 | 0.767 |
| ENSP00000314004 | ANAPC2  | 5    | 0.503 |
| ENSP00000314458 | CDC42   | 74   | 1     |
| ENSP00000314491 | SRRT    | 224  | 0.349 |
| ENSP00000314949 | POLR2A  | 31   | 0.888 |
| ENSP00000315615 | AKAP5   | 363  | 0.068 |
| ENSP00000315644 | TYMS    | 1056 | 0.05  |
| ENSP00000315702 | MOB4    | 217  | 0.138 |
| ENSP00000315859 | RNPS1   | 2    | 0.844 |
| ENSP00000315997 | LILRB1  | 363  | 0     |
| ENSP00000316136 | KCNJ1   | 362  | 0.009 |
| ENSP00000316152 | SFTPC   | 1    | 0.019 |
| ENSP00000316460 | FYB     | 7    | 0.201 |
| ENSP00000316786 | HSD11B2 | 363  | 0.001 |
| ENSP00000316879 | EIF4G1  | 725  | 0.121 |
| ENSP00000318472 | NCAM1   | 2    | 0.21  |
| ENSP00000318861 | SF3B2   | 2    | 0.8   |
| ENSP00000319060 | CAMK2G  | 362  | 0.025 |
| ENSP00000319169 | PRMT5   | 356  | 0.216 |
| ENSP00000319788 | NQO1    | 1    | 0.042 |
| ENSP00000320147 | EZH2    | 352  | 0.278 |

|                 |         |      |       |
|-----------------|---------|------|-------|
| ENSP00000320180 | GHRHR   | 358  | 0.03  |
| ENSP00000320940 | NCOA1   | 3886 | 0     |
| ENSP00000321656 | CDC25C  | 17   | 0.185 |
| ENSP00000323050 | RBBP8   | 93   | 0.189 |
| ENSP00000324648 | CYP2B6  | 363  | 0.155 |
| ENSP00000324729 | SAV1    | 2    | 0.203 |
| ENSP00000324804 | PPP2R1A | 86   | 0.222 |
| ENSP00000324806 | GSK3B   | 317  | 0.565 |
| ENSP00000324856 | STK11   | 362  | 0.144 |
| ENSP00000324890 | CD28    | 102  | 0.391 |
| ENSP00000324897 | UBE2I   | 415  | 0.817 |
| ENSP00000326031 | PPP1CA  | 1    | 0.631 |
| ENSP00000326366 | PSEN1   | 167  | 0.502 |
| ENSP00000326804 | CUL1    | 371  | 0.121 |
| ENSP00000327246 | VIPR1   | 361  | 0.008 |
| ENSP00000327336 | BGN     | 363  | 0     |
| ENSP00000329357 | SP1     | 220  | 0.545 |
| ENSP00000329380 | GP1BA   | 267  | 0.383 |
| ENSP00000329411 | IRF7    | 2    | 0.412 |
| ENSP00000329623 | BCL2    | 515  | 0.206 |
| ENSP00000329967 | TBK1    | 19   | 0.338 |
| ENSP00000330054 | EEF1A1  | 724  | 0.001 |

|                 |          |       |       |
|-----------------|----------|-------|-------|
| ENSP00000330237 | CASP9    | 12    | 0.191 |
| ENSP00000330382 | PDGFB    | 363   | 0     |
| ENSP00000330393 | LEPR     | 1     | 0.407 |
| ENSP00000331201 | HGS      | 363   | 0.021 |
| ENSP00000331358 | GAST     | 220   | 0.083 |
| ENSP00000332353 | PTCH1    | 1071  | 0.034 |
| ENSP00000332643 | NDN      | 80    | 0.034 |
| ENSP00000332973 | SMAD3    | 382   | 0.114 |
| ENSP00000333001 | RBM8A    | 4     | 0.646 |
| ENSP00000334458 | GATA4    | 359   | 0.2   |
| ENSP00000334940 | GGN      | 363   | 0     |
| ENSP00000335153 | HSP90AA1 | 10574 | 0.193 |
| ENSP00000335620 | GSTA1    | 2     | 0.394 |
| ENSP00000336630 | ADORA2A  | 347   | 0.095 |
| ENSP00000336741 | DHX15    | 4     | 0.319 |
| ENSP00000336790 | ATF4     | 345   | 0.234 |
| ENSP00000337014 | HFE2     | 4     | 0.046 |
| ENSP00000337773 | NQO2     | 2     | 0.008 |
| ENSP00000337825 | LCK      | 168   | 0.839 |
| ENSP00000337915 | CYP3A4   | 1453  | 0.538 |
| ENSP00000338018 | HIF1A    | 1713  | 0.819 |
| ENSP00000338799 | IL6ST    | 63    | 0.424 |

|                 |         |      |       |
|-----------------|---------|------|-------|
| ENSP00000338934 | EZR     | 119  | 0.77  |
| ENSP00000338983 | MUC1    | 363  | 0.16  |
| ENSP00000339007 | GRB2    | 999  | 0.975 |
| ENSP00000339109 | ANAPC1  | 461  | 0.175 |
| ENSP00000339151 | IKBKB   | 43   | 0.027 |
| ENSP00000339328 | PLAUR   | 7    | 0.24  |
| ENSP00000339428 | SOCS2   | 1    | 0.073 |
| ENSP00000340330 | KAT5    | 152  | 0.806 |
| ENSP00000340684 | MAOA    | 363  | 0.039 |
| ENSP00000340858 | B2M     | 2564 | 0     |
| ENSP00000340944 | PTPN11  | 130  | 0.486 |
| ENSP00000341189 | PTK2    | 1138 | 0.053 |
| ENSP00000341268 | TRADD   | 24   | 0.063 |
| ENSP00000341344 | GGA1    | 4    | 0.463 |
| ENSP00000341835 | MYOCD   | 1    | 0.029 |
| ENSP00000342007 | CYP1A2  | 725  | 0.07  |
| ENSP00000342215 | KIR2DL3 | 12   | 0.492 |
| ENSP00000342374 | SNRPD2  | 20   | 0.372 |
| ENSP00000342793 | PLD1    | 231  | 0.061 |
| ENSP00000342952 | ADCY2   | 61   | 0.81  |
| ENSP00000343054 | RBM5    | 9    | 0.653 |
| ENSP00000343925 | ESR2    | 722  | 0.057 |

|                 |         |       |       |
|-----------------|---------|-------|-------|
| ENSP00000344115 | CDH5    | 1     | 0.362 |
| ENSP00000344220 | PDPK1   | 18    | 0.101 |
| ENSP00000344352 | ATF3    | 707   | 0.06  |
| ENSP00000344456 | CTNNB1  | 4476  | 0.009 |
| ENSP00000344668 | KRIT1   | 362   | 0.016 |
| ENSP00000344818 | UBC     | 24398 | 0.049 |
| ENSP00000345344 | CTSL    | 363   | 0.043 |
| ENSP00000345530 | NEDD4   | 363   | 0.003 |
| ENSP00000345571 | E2F1    | 441   | 0.126 |
| ENSP00000345681 | GATA2   | 2     | 0.062 |
| ENSP00000345751 | SCNN1B  | 1     | 0.001 |
| ENSP00000346001 | RPL3    | 1     | 0.089 |
| ENSP00000346022 | RPL9    | 1     | 0.695 |
| ENSP00000346294 | S100A4  | 365   | 0     |
| ENSP00000346839 | FN1     | 833   | 0.615 |
| ENSP00000347046 | PDE5A   | 363   | 0.003 |
| ENSP00000347858 | XIAP    | 10    | 0.306 |
| ENSP00000348307 | SIRPA   | 307   | 0.118 |
| ENSP00000348461 | RAC1    | 33    | 0.925 |
| ENSP00000348551 | NCOR2   | 14    | 0.798 |
| ENSP00000348554 | CDC16   | 16    | 0.307 |
| ENSP00000348577 | RANGAP1 | 346   | 0.699 |



|                 |          |      |       |
|-----------------|----------|------|-------|
| ENSP00000348708 | UPF2     | 11   | 0.994 |
| ENSP00000348775 | ACOX3    | 363  | 0     |
| ENSP00000348786 | RAP1A    | 8    | 0.184 |
| ENSP00000348986 | INS-IGF2 | 251  | 0.94  |
| ENSP00000349049 | KDM1A    | 1    | 0.313 |
| ENSP00000349393 | LIG4     | 1    | 0.025 |
| ENSP00000349467 | CALM1    | 405  | 0.264 |
| ENSP00000350708 | RAD23B   | 350  | 0.37  |
| ENSP00000350877 | SRSF2    | 7    | 0.626 |
| ENSP00000350941 | SRC      | 2389 | 0.136 |
| ENSP00000351273 | CASP8    | 30   | 0.452 |
| ENSP00000351407 | ARNT     | 336  | 0.667 |
| ENSP00000351486 | NTRK1    | 1001 | 0.021 |
| ENSP00000351490 | MAX      | 363  | 0.022 |
| ENSP00000351908 | MAP3K5   | 371  | 0.047 |
| ENSP00000351997 | MAP2K6   | 508  | 0.002 |
| ENSP00000352400 | NUP214   | 352  | 0.434 |
| ENSP00000352608 | RYR1     | 22   | 0.383 |
| ENSP00000352842 | PFKM     | 363  | 0.02  |
| ENSP00000352929 | CSNK1E   | 363  | 0.039 |
| ENSP00000352980 | HIST1H4A | 28   | 0.667 |
| ENSP00000353483 | MAPK8    | 195  | 0.688 |

|                 |          |     |       |
|-----------------|----------|-----|-------|
| ENSP00000353915 | HTR4     | 4   | 0.772 |
| ENSP00000354394 | STAT1    | 591 | 0.263 |
| ENSP00000354458 | C8A      | 363 | 0     |
| ENSP00000354511 | COMT     | 1   | 0.267 |
| ENSP00000354522 | TOP1     | 174 | 0.301 |
| ENSP00000354558 | MTOR     | 552 | 0.529 |
| ENSP00000354609 | CNKSR1   | 363 | 0     |
| ENSP00000354612 | PTGS1    | 591 | 0.053 |
| ENSP00000354621 | SMURF1   | 362 | 0.046 |
| ENSP00000354859 | DRD2     | 2   | 0.837 |
| ENSP00000354927 | MAP3K3   | 362 | 0.048 |
| ENSP00000355261 | SMG5     | 8   | 0.242 |
| ENSP00000355759 | PARP1    | 355 | 0.455 |
| ENSP00000355930 | SLC22A1  | 1   | 0.008 |
| ENSP00000356070 | MAPKAPK2 | 369 | 0.052 |
| ENSP00000356087 | IKBKE    | 29  | 0.233 |
| ENSP00000356236 | SYT2     | 1   | 0     |
| ENSP00000356438 | PTGS2    | 719 | 0.318 |
| ENSP00000356480 | RNF2     | 1   | 0.141 |
| ENSP00000356541 | SF3B5    | 4   | 0.076 |
| ENSP00000356832 | SGK1     | 277 | 0.014 |
| ENSP00000357392 | EFNA1    | 2   | 0.1   |

|                 |        |      |       |
|-----------------|--------|------|-------|
| ENSP00000357656 | FYN    | 217  | 0.936 |
| ENSP00000357674 | SNAPIN | 1    | 0.084 |
| ENSP00000357858 | BUB3   | 690  | 0.37  |
| ENSP00000357879 | PSMD4  | 350  | 0.496 |
| ENSP00000358022 | MCL1   | 397  | 0.242 |
| ENSP00000358335 | MAP3K7 | 477  | 0.011 |
| ENSP00000358525 | NGF    | 950  | 0.14  |
| ENSP00000358541 | SIKE1  | 29   | 0.248 |
| ENSP00000358595 | CGA    | 364  | 0.049 |
| ENSP00000358622 | IKBKG  | 355  | 0.321 |
| ENSP00000358727 | GSTO1  | 5    | 0.104 |
| ENSP00000358866 | FLNA   | 363  | 0.024 |
| ENSP00000359206 | BTRC   | 44   | 0.276 |
| ENSP00000359211 | DPYD   | 362  | 0.028 |
| ENSP00000359345 | RPL5   | 361  | 0.585 |
| ENSP00000359531 | GTF2B  | 12   | 0.901 |
| ENSP00000359998 | GSTA4  | 4    | 0.206 |
| ENSP00000360141 | GNAS   | 1    | 0.071 |
| ENSP00000360266 | JUN    | 2673 | 0.123 |
| ENSP00000360683 | PTPN1  | 403  | 0.16  |
| ENSP00000360869 | IFIT1  | 362  | 0.049 |
| ENSP00000361066 | NCOA3  | 77   | 0.127 |

|                 |          |     |       |
|-----------------|----------|-----|-------|
| ENSP00000361120 | RALGDS   | 363 | 0     |
| ENSP00000361125 | VEGFA    | 346 | 0.52  |
| ENSP00000361366 | SFTPD    | 363 | 0     |
| ENSP00000361418 | IPO13    | 84  | 0.41  |
| ENSP00000361423 | ABL1     | 48  | 0.949 |
| ENSP00000361512 | PRPS1    | 360 | 0.016 |
| ENSP00000361892 | STK4     | 2   | 0.192 |
| ENSP00000362413 | PGK1     | 353 | 0.072 |
| ENSP00000362820 | SRSF3    | 7   | 0.541 |
| ENSP00000363055 | ZWINT    | 363 | 0.246 |
| ENSP00000363081 | DKK1     | 5   | 0.112 |
| ENSP00000363377 | FOXO4    | 49  | 0.009 |
| ENSP00000363512 | ALOX5    | 366 | 0.04  |
| ENSP00000363591 | BAK1     | 4   | 0.005 |
| ENSP00000363641 | TXN      | 9   | 0.21  |
| ENSP00000363708 | BMPR2    | 4   | 0.166 |
| ENSP00000363832 | AOX1     | 271 | 0.025 |
| ENSP00000364094 | ITGB1    | 718 | 0.348 |
| ENSP00000364403 | UBR4     | 363 | 0     |
| ENSP00000364847 | MAGED1   | 363 | 0.001 |
| ENSP00000364898 | SYK      | 316 | 0.695 |
| ENSP00000365435 | TNFRSF1B | 363 | 0.002 |

|                 |         |      |       |
|-----------------|---------|------|-------|
| ENSP00000365439 | HNRNPK  | 960  | 0.823 |
| ENSP00000365858 | GATA1   | 2    | 0.025 |
| ENSP00000365891 | WAS     | 24   | 0.956 |
| ENSP00000366135 | EXOSC10 | 10   | 0.995 |
| ENSP00000366565 | VPS28   | 363  | 0.019 |
| ENSP00000367207 | MYC     | 729  | 0.25  |
| ENSP00000367299 | VPS36   | 363  | 0.003 |
| ENSP00000367309 | MAOB    | 1    | 0.351 |
| ENSP00000367316 | ITGA8   | 284  | 0.172 |
| ENSP00000367910 | FANCG   | 360  | 0.077 |
| ENSP00000367959 | HTR2A   | 4    | 0.806 |
| ENSP00000368104 | BMP2    | 442  | 0.218 |
| ENSP00000368438 | PCNA    | 1826 | 0.612 |
| ENSP00000368683 | EDN1    | 364  | 0.051 |
| ENSP00000368699 | ISG15   | 724  | 0.033 |
| ENSP00000368766 | ADRA1D  | 262  | 0.017 |
| ENSP00000369050 | CYP1A1  | 6    | 0.691 |
| ENSP00000369213 | DDX58   | 724  | 0.033 |
| ENSP00000369816 | SHBG    | 363  | 0.01  |
| ENSP00000370343 | IRF4    | 3    | 0.152 |
| ENSP00000370473 | IGFBP3  | 9    | 0.894 |
| ENSP00000370503 | CCM2    | 362  | 0.018 |

|                 |        |      |       |
|-----------------|--------|------|-------|
| ENSP00000371138 | FKBP1A | 26   | 0.389 |
| ENSP00000371432 | PRLR   | 4    | 0.555 |
| ENSP00000371973 | SAP18  | 2    | 0.266 |
| ENSP00000372793 | LTA    | 160  | 0.079 |
| ENSP00000372975 | HLA-C  | 8    | 0.23  |
| ENSP00000376076 | SUMO1  | 15   | 0.933 |
| ENSP00000376776 | DBH    | 366  | 0.009 |
| ENSP00000378165 | ZNF207 | 690  | 0.322 |
| ENSP00000378323 | PPP3CA | 363  | 0.05  |
| ENSP00000378529 | FZR1   | 21   | 0.333 |
| ENSP00000379213 | PTHLH  | 3    | 0.112 |
| ENSP00000379330 | NFATC2 | 37   | 0.082 |
| ENSP00000379625 | MYD88  | 2    | 0.552 |
| ENSP00000380150 | CARD11 | 355  | 0.059 |
| ENSP00000380227 | ITGA4  | 258  | 0.145 |
| ENSP00000380280 | FGFR1  | 1798 | 0.001 |
| ENSP00000381331 | HDAC2  | 354  | 0.513 |
| ENSP00000381607 | GSTP1  | 843  | 0.001 |
| ENSP00000382166 | CX3CR1 | 363  | 0     |
| ENSP00000382342 | ABCC1  | 350  | 0.1   |
| ENSP00000382697 | ROCK1  | 363  | 0.001 |
| ENSP00000382723 | AGPAT1 | 1    | 0.058 |

|                 |        |     |       |
|-----------------|--------|-----|-------|
| ENSP00000383199 | NEDD4L | 259 | 0.151 |
| ENSP00000384053 | CSF2RB | 3   | 0.531 |
| ENSP00000384273 | RELA   | 732 | 0.209 |
| ENSP00000384675 | SOS1   | 477 | 0.914 |
| ENSP00000385021 | FANCL  | 363 | 0     |
| ENSP00000386069 | ADRA2C | 10  | 0.281 |
| ENSP00000386171 | ESRRG  | 363 | 0.094 |
| ENSP00000386717 | RPL31  | 1   | 0.005 |
| ENSP00000386896 | ITGA6  | 3   | 0.252 |
| ENSP00000387286 | RAB1A  | 348 | 0.264 |
| ENSP00000387662 | GCG    | 220 | 0.375 |
| ENSP00000389934 | EXOC5  | 1   | 0.364 |
| ENSP00000390500 | STK3   | 2   | 0.235 |
| ENSP00000391592 | PTPN6  | 3   | 0.529 |
| ENSP00000396127 | RAN    | 350 | 0.693 |
| ENSP00000396308 | DHFR   | 369 | 0.152 |
| ENSP00000396439 | RING1  | 362 | 0.019 |
| ENSP00000399968 | NCOA2  | 14  | 0.063 |
| ENSP00000400175 | RHOA   | 363 | 0.099 |
| ENSP00000401303 | SHC1   | 936 | 0.044 |
| ENSP00000401802 | PSMC6  | 112 | 0.135 |
| ENSP00000401980 | MAVS   | 2   | 0.359 |

|                 |        |      |       |
|-----------------|--------|------|-------|
| ENSP00000404121 | ILF3   | 366  | 0.152 |
| ENSP00000407431 | HLA-C  | 12   | 0.44  |
| ENSP00000409132 | HLA-G  | 414  | 0.134 |
| ENSP00000410294 | FGFR2  | 1085 | 0     |
| ENSP00000411532 | TOP2A  | 360  | 0.144 |
| ENSP00000411698 | USO1   | 363  | 0.079 |
| ENSP00000412045 | TXNRD1 | 1    | 0.029 |
| ENSP00000413720 | CDKN1C | 363  | 0     |
| ENSP00000414634 | LSM2   | 9    | 0.967 |
| ENSP00000415183 | MUC2   | 363  | 0.002 |
| ENSP00000415615 | CSNK2B | 362  | 0.037 |
| ENSP00000416097 | GOLGA2 | 15   | 0.198 |
| ENSP00000417281 | MDM2   | 420  | 0.972 |
| ENSP00000417404 | HFE    | 794  | 0.015 |
| ENSP00000418447 | PPP2CA | 244  | 0.812 |
| ENSP00000419599 | DPH3   | 363  | 0     |
| ENSP00000419692 | RXRA   | 52   | 0.869 |
| ENSP00000420168 | GSTA2  | 20   | 0     |
