# Supplementary material for: Identifying New Candidate Genes and Chemicals Related to Prostate Cancer Using a Hybrid Network and Shortest Path Approach
Source: Hindawi journal article supplement (doi:10.1155/2015/462363), 2015-01-01
Supplement: f1 [file 462363.f1.zip]

## **Supplementary Material I. Genes and chemicals related to prostate cancer**

### **1. 309 genes related to prostate cancer**

ACPP  
ADRA1A  
AGR2  
ALCAM  
ALDH1A2  
ALKBH3  
ALPHA  
AMACR  
ANP32C  
ANXA1  
ANXA7  
APA  
APAF1  
APT1  
AR  
ARHGEF26  
ASRGL1  
AXL  
BAGE  
BCLAF1  
BECN1  
BEND4  
BIN1  
BMP10  
BMP-2  
BMP4  
BNIP3L  
BRCA1  
BRCA2  
CACNA1G  
CADM4  
CAND1  
CARM1  
CAV1  
CBS  
CD59  
CDK4  
CDKN1A  
CDKN2A  
CEACAM1  
CEBPA

CELL  
CEP192  
CERS2  
CHEK2  
CHK2  
CLNS1A  
CLU  
CMTM5  
COL18A1  
COX-1  
CREB3L4  
CRP1  
CSTA  
CTNNA1  
CTNND1  
CTPS1  
CTTN  
CYP24  
DAB2  
DAB2IP  
DAO  
DBP  
DCC  
DKC1  
DLC1  
DMBT1  
DNMT1  
DPH1  
DSC1  
EAF2  
EBAG9  
EDNRB  
EEF1B2  
EEF1D  
EGFR  
EHBP1  
EHF  
EIF2AK2  
EIF4EBP1  
EIF5B  
ELAC2  
EPHA2  
EPHB2  
FBXO25

FGF10  
FGF2  
FGF3  
FGF8  
FLT-1  
FOLH1  
FOXO1  
FOXP3  
FRYL  
FSHR  
FZD1  
G3BP1  
GAMMA  
GAPDH  
GAS5  
GAS6  
GBX1  
GBX2  
GGNBP2  
GGT  
GHR  
GHRH  
GLI2  
GLIPR1  
GPX1  
GPX3  
GREB1  
GSTT1  
H19  
H2AFV  
HDAC1  
HDGF  
HIC1  
HK2  
HLA-A  
HMGA2  
HN1  
HNF1B  
HNRNPA3  
HNRNPU  
HPC2  
HSP27  
HSP60  
HTATIP2

HTR  
IGF2R  
IGFBP-3  
IL24  
INHA  
INT2  
INT-2  
IRS-1  
ITGA7  
JAK1  
JAK2  
JDP2  
JTB  
KCNRG  
KGF  
KLF5  
KLF6  
KLK10  
KLK4  
LATS2  
LEU  
LGALS8  
LHR  
LIPASE  
LITAF  
LPL  
LRRC26  
LZTS1  
MAGED2  
MAP1B  
MAP3K7CL  
MAP4  
MBP  
MCL-1  
MCM2  
MCM3  
MEG3  
MFAP1  
MGP  
MIR1-1  
MIR15A  
MIR193B  
MIR449A  
MRP-1

MRP3  
MSMB  
MSR1  
MTHFD1  
MX1  
MXI1  
MYH9  
NCL  
NCOA4  
NDRG1  
NF1  
NF2  
NGFR  
NKX3-1  
NOP56  
NSD1  
NUCKS1  
OAS3  
P120  
P21  
P450  
P51  
PARM1  
PASP  
PAX6  
PBOV1  
PCAP  
PCDH11Y  
PCGF2  
PCOTH  
PDAP1  
PDLIM4  
PEBP1  
PERP  
PFKL  
PGRMC1  
PHB  
PHLPP1  
PIK3C2G  
PIN  
PLA2  
PLK-1  
PML  
PPP2CB

PPP3CC  
PRAME  
PRDM2  
PRKAR2A  
PSA  
PSCA  
PSMA  
PSMA3  
PSPH  
PTEN  
PTENP1  
PTGES3  
PTPRJ  
PWP1  
RAGE  
RALY  
RASL11A  
RASSF1  
RB1  
RB2  
RDH11  
RGS3  
RNASEL  
RND3  
RNF113A  
RPL10  
RPL28  
RYK  
S100A2  
SCFD1  
SEC14L2  
SERPINB5  
SHH  
SKP2  
SLC39A1  
SLC43A1  
SLC45A3  
SLC5A8  
SMAD4  
SMAD6  
SMAD7  
SMN1  
SNORD50A  
SOX7

SPDEF  
SPRY2  
SSTR1  
SSTR2  
SSTR5  
ST13  
ST7  
STAT3  
STEAP4  
STK39  
SUFU  
SULF1  
TAOK2  
TBP  
TCHP  
TFPI2  
TFRC  
TGFA  
TGFBR1  
TIMP-1  
TIMP-2  
TMEFF2  
TMPO  
TNF  
TNKS1BP1  
TOP2B  
TP53  
TP63  
TRH  
TRPM8  
TRPV1  
TRPV6  
TSC1  
TYK2  
UFO  
UGT  
USP10  
USP2  
VIP  
VWF  
WNK1  
WNT5A  
WT1  
WWOX

XPC  
YBX1  
ZFHX3  
ZFPM1

2. 106 chemicals related to prostate cancer

CID000000299  
CID000000727  
CID000000896  
CID000001530  
CID000001725  
CID000002145  
CID000002336  
CID000002353  
CID000002375  
CID000002514  
CID000002662  
CID000002907  
CID000002955  
CID000003035  
CID000003036  
CID000003039  
CID000003117  
CID000003157  
CID000003385  
CID000003397  
CID000003589  
CID000003657  
CID000003672  
CID000003690  
CID000004055  
CID000004212  
CID000004380  
CID000004463  
CID000004534  
CID000005035  
CID000005212  
CID000005216  
CID000005238  
CID000005401  
CID000005426  
CID000005455  
CID000005743  
CID000005746  
CID000005754



CID000005755  
CID000005757  
CID000005865  
CID000005870  
CID000005978  
CID000005991  
CID000005995  
CID000006001  
CID000006010  
CID000006013  
CID000006279  
CID000006323  
CID000006623  
CID000006636  
CID000008268  
CID000009444  
CID000012699  
CID000013676  
CID000014985  
CID000016590  
CID000023978  
CID000023994  
CID000024934  
CID000031703  
CID000036462  
CID000036523  
CID000041867  
CID000050224  
CID000060749  
CID000060953  
CID000062275  
CID000064982  
CID000066414  
CID000091469  
CID000092729  
CID000107935  
CID000107971  
CID000108143  
CID000115196  
CID000126941  
CID000148123  
CID000161597  
CID000241902  
CID000443495

CID000445154  
CID000446925  
CID000448537  
CID000449171  
CID000460612  
CID001548943  
CID002733525  
CID003001028  
CID003032325  
CID005280343  
CID005280373  
CID005280443  
CID005280453  
CID005280795  
CID005280961  
CID005281104  
CID005281614  
CID005281707  
CID005282360  
CID005283731  
CID005353562  
CID005359596  
CID011020241
