# Supplementary material for: Identifying New Candidate Genes and Chemicals Related to Prostate Cancer Using a Hybrid Network and Shortest Path Approach
Source: Hindawi journal article supplement (doi:10.1155/2015/462363), 2015-01-01
Supplement: f1 [file 462363.f1.zip]

**Supplementary Material III.** Significant candidate genes and chemicals, their betweenness and p-values

| <b>Chemical or gene ID</b> | <b>Chemical or gene name</b> | <b>Betweenness</b> | <b>P-value</b> |
|----------------------------|------------------------------|--------------------|----------------|
| CID000000259               | bromide                      | 363                | 0.002          |
| CID000002519               | caffeine                     | 371                | 0.028          |
| CID000004636               | oxymetazoline                | 14                 | 0.001          |
| CID000005566               | trifluoperazine              | 363                | 0.001          |
| CID000005960               | L-aspartate                  | 363                | 0.011          |
| CID000006503               | tris                         | 1083               | 0.011          |
| CID000060662               | mibefradil                   | 363                | 0.013          |
| CID000065036               | allicin                      | 2                  | 0.024          |
| CID000119400               | tartrate                     | 363                | 0.005          |
| CID000157350               | hydroxyl radical             | 362                | 0.005          |
| CID000161930               | icilin                       | 363                | 0              |
| ENSP00000006053            | CX3CL1                       | 363                | 0.001          |
| ENSP00000008527            | CRY1                         | 363                | 0.012          |
| ENSP00000010338            | TRAF3IP3                     | 363                | 0.017          |
| ENSP00000160373            | CTTNBP2                      | 86                 | 0.028          |
| ENSP00000162749            | TNFRSF1A                     | 1253               | 0.003          |
| ENSP00000173229            | NTN1                         | 365                | 0.042          |
| ENSP00000196551            | RPS5                         | 363                | 0.011          |
| ENSP00000206249            | ESR1                         | 11815              | 0.001          |
| ENSP00000212355            | TGFB3                        | 362                | 0.006          |
| ENSP00000215479            | AMELY                        | 363                | 0              |
| ENSP00000216554            | EIF5                         | 363                | 0.011          |
| ENSP00000216862            | CYP24A1                      | 36                 | 0              |
| ENSP00000221930            | TGFB1                        | 1003               | 0.046          |
| ENSP00000221957            | PLIN3                        | 363                | 0.001          |
| ENSP00000222254            | PIK3R2                       | 5                  | 0.036          |
| ENSP00000224181            | C8G                          | 363                | 0.003          |
| ENSP00000225831            | CCL2                         | 363                | 0.009          |
| ENSP00000226413            | GNRHR                        | 363                | 0              |

|                 |         |      |       |
|-----------------|---------|------|-------|
| ENSP00000226574 | NFKB1   | 363  | 0.011 |
| ENSP00000227507 | CCND1   | 2792 | 0.005 |
| ENSP00000227758 | BIRC2   | 1583 | 0     |
| ENSP00000228682 | GLI1    | 358  | 0.041 |
| ENSP00000228837 | FGF6    | 1074 | 0.003 |
| ENSP00000229022 | VDR     | 1147 | 0.02  |
| ENSP00000229794 | MAPK14  | 748  | 0.031 |
| ENSP00000231509 | NR3C1   | 2957 | 0.001 |
| ENSP00000234310 | PPP3R1  | 363  | 0.003 |
| ENSP00000237612 | ABCG2   | 376  | 0.048 |
| ENSP00000241337 | GSTM2   | 2    | 0.037 |
| ENSP00000244007 | PLCG1   | 2110 | 0     |
| ENSP00000245323 | EFNB2   | 364  | 0.01  |
| ENSP00000245457 | PTGER2  | 4    | 0.049 |
| ENSP00000245541 | GGA3    | 564  | 0.022 |
| ENSP00000245544 | NUP85   | 362  | 0.011 |
| ENSP00000247668 | TRAF2   | 1898 | 0.01  |
| ENSP00000248553 | HSPB1   | 363  | 0.048 |
| ENSP00000251810 | RRM2B   | 343  | 0.032 |
| ENSP00000252506 | GADD45G | 8    | 0.01  |
| ENSP00000252997 | GATA5   | 40   | 0.049 |
| ENSP00000254066 | RARA    | 1218 | 0.042 |
| ENSP00000254122 | FSHB    | 363  | 0.03  |
| ENSP00000254657 | PER2    | 363  | 0.023 |
| ENSP00000256216 | HSD17B4 | 363  | 0.003 |
| ENSP00000258418 | CAB39   | 362  | 0.021 |
| ENSP00000260433 | CYP19A1 | 1426 | 0.011 |
| ENSP00000261349 | LRP6    | 1086 | 0.011 |
| ENSP00000261366 | LMNB1   | 363  | 0.048 |
| ENSP00000261733 | ALDH2   | 363  | 0.017 |
| ENSP00000261799 | PDGFRB  | 844  | 0.003 |
| ENSP00000262053 | ATF1    | 362  | 0.002 |
| ENSP00000262209 | TRPA1   | 363  | 0.022 |

|                 |           |      |       |
|-----------------|-----------|------|-------|
| ENSP00000262320 | AXIN1     | 1874 | 0.031 |
| ENSP00000262367 | CREBBP    | 3569 | 0     |
| ENSP00000262809 | ELL       | 363  | 0     |
| ENSP00000263025 | MAPK3     | 357  | 0.024 |
| ENSP00000263125 | PRKCQ     | 363  | 0.001 |
| ENSP00000263126 | AKR1C4    | 363  | 0     |
| ENSP00000263277 | EHD2      | 363  | 0     |
| ENSP00000263408 | C9        | 363  | 0     |
| ENSP00000263915 | GRB14     | 1    | 0.001 |
| ENSP00000263918 | STRN      | 10   | 0.049 |
| ENSP00000263946 | PKP1      | 1    | 0     |
| ENSP00000264001 | CKLF      | 363  | 0     |
| ENSP00000264110 | ATF2      | 459  | 0.047 |
| ENSP00000264832 | ICAM1     | 363  | 0.035 |
| ENSP00000265734 | CDK6      | 363  | 0.014 |
| ENSP00000265965 | SERGEF    | 363  | 0     |
| ENSP00000267082 | ITGB7     | 233  | 0.027 |
| ENSP00000269141 | CDH2      | 2217 | 0.023 |
| ENSP00000272190 | REN       | 804  | 0.029 |
| ENSP00000272298 | CALM2     | 358  | 0.031 |
| ENSP00000273047 | RAB5A     | 363  | 0.037 |
| ENSP00000274376 | RASA1     | 856  | 0.006 |
| ENSP00000276414 | GNRH1     | 363  | 0.031 |
| ENSP00000276431 | TNFRSF10B | 11   | 0     |
| ENSP00000276603 | TERF1     | 363  | 0.016 |
| ENSP00000279488 | DUSP6     | 9    | 0.029 |
| ENSP00000281623 | FBXO4     | 86   | 0.031 |
| ENSP00000283635 | CD8A      | 13   | 0.047 |
| ENSP00000284523 | WNT3A     | 725  | 0.007 |
| ENSP00000286627 | KCNMA1    | 363  | 0.009 |
| ENSP00000287641 | SST       | 1085 | 0     |
| ENSP00000288422 | TAB3      | 363  | 0     |
| ENSP00000290330 | SNF8      | 363  | 0.001 |

|                 |         |      |       |
|-----------------|---------|------|-------|
| ENSP00000293308 | KRT8    | 363  | 0     |
| ENSP00000293549 | WNT1    | 363  | 0.006 |
| ENSP00000294304 | LRP5    | 363  | 0.004 |
| ENSP00000294954 | LHCGR   | 363  | 0     |
| ENSP00000295408 | MERTK   | 724  | 0     |
| ENSP00000295600 | MITF    | 363  | 0     |
| ENSP00000296181 | ITGB5   | 1    | 0.037 |
| ENSP00000296575 | HHIP    | 3    | 0.026 |
| ENSP00000298772 | TRIM13  | 363  | 0     |
| ENSP00000300738 | RRM1    | 363  | 0.008 |
| ENSP00000304236 | CD14    | 1    | 0.028 |
| ENSP00000308741 | CLOCK   | 363  | 0.013 |
| ENSP00000309572 | TERT    | 373  | 0.013 |
| ENSP00000310127 | IRF3    | 748  | 0.003 |
| ENSP00000311032 | CASP3   | 2098 | 0.001 |
| ENSP00000311502 | HEG1    | 362  | 0.003 |
| ENSP00000311579 | TNKS    | 363  | 0     |
| ENSP00000312987 | HNF4A   | 1    | 0.035 |
| ENSP00000315997 | LILRB1  | 363  | 0     |
| ENSP00000316136 | KCNJ1   | 362  | 0.009 |
| ENSP00000316152 | SFTPC   | 1    | 0.019 |
| ENSP00000316786 | HSD11B2 | 363  | 0.001 |
| ENSP00000319060 | CAMK2G  | 362  | 0.025 |
| ENSP00000319788 | NQO1    | 1    | 0.042 |
| ENSP00000320180 | GHRHR   | 358  | 0.03  |
| ENSP00000320940 | NCOA1   | 3886 | 0     |
| ENSP00000327246 | VIPR1   | 361  | 0.008 |
| ENSP00000327336 | BGN     | 363  | 0     |
| ENSP00000330054 | EEF1A1  | 724  | 0.001 |
| ENSP00000330382 | PDGFB   | 363  | 0     |
| ENSP00000331201 | HGS     | 363  | 0.021 |
| ENSP00000332353 | PTCH1   | 1071 | 0.034 |
| ENSP00000332643 | NDN     | 80   | 0.034 |

|                 |         |       |       |
|-----------------|---------|-------|-------|
| ENSP00000334940 | GGN     | 363   | 0     |
| ENSP00000337014 | HFE2    | 4     | 0.046 |
| ENSP00000337773 | NQO2    | 2     | 0.008 |
| ENSP00000339151 | IKBKB   | 43    | 0.027 |
| ENSP00000340684 | MAOA    | 363   | 0.039 |
| ENSP00000340858 | B2M     | 2564  | 0     |
| ENSP00000341835 | MYOCD   | 1     | 0.029 |
| ENSP00000344456 | CTNNB1  | 4476  | 0.009 |
| ENSP00000344668 | KRIT1   | 362   | 0.016 |
| ENSP00000344818 | UBC     | 24398 | 0.049 |
| ENSP00000345344 | CTSL    | 363   | 0.043 |
| ENSP00000345530 | NEDD4   | 363   | 0.003 |
| ENSP00000345751 | SCNN1B  | 1     | 0.001 |
| ENSP00000346294 | S100A4  | 365   | 0     |
| ENSP00000347046 | PDE5A   | 363   | 0.003 |
| ENSP00000348775 | ACOX3   | 363   | 0     |
| ENSP00000349393 | LIG4    | 1     | 0.025 |
| ENSP00000351486 | NTRK1   | 1001  | 0.021 |
| ENSP00000351490 | MAX     | 363   | 0.022 |
| ENSP00000351908 | MAP3K5  | 371   | 0.047 |
| ENSP00000351997 | MAP2K6  | 508   | 0.002 |
| ENSP00000352842 | PFKM    | 363   | 0.02  |
| ENSP00000352929 | CSNK1E  | 363   | 0.039 |
| ENSP00000354458 | C8A     | 363   | 0     |
| ENSP00000354609 | CNKSR1  | 363   | 0     |
| ENSP00000354621 | SMURF1  | 362   | 0.046 |
| ENSP00000354927 | MAP3K3  | 362   | 0.048 |
| ENSP00000355930 | SLC22A1 | 1     | 0.008 |
| ENSP00000356236 | SYT2    | 1     | 0     |
| ENSP00000356832 | SGK1    | 277   | 0.014 |
| ENSP00000358335 | MAP3K7  | 477   | 0.011 |
| ENSP00000358595 | CGA     | 364   | 0.049 |
| ENSP00000358866 | FLNA    | 363   | 0.024 |

|                 |          |      |       |
|-----------------|----------|------|-------|
| ENSP00000359211 | DPYD     | 362  | 0.028 |
| ENSP00000360869 | IFIT1    | 362  | 0.049 |
| ENSP00000361120 | RALGDS   | 363  | 0     |
| ENSP00000361366 | SFTPD    | 363  | 0     |
| ENSP00000361512 | PRPS1    | 360  | 0.016 |
| ENSP00000363377 | FOXO4    | 49   | 0.009 |
| ENSP00000363512 | ALOX5    | 366  | 0.04  |
| ENSP00000363591 | BAK1     | 4    | 0.005 |
| ENSP00000363832 | AOX1     | 271  | 0.025 |
| ENSP00000364403 | UBR4     | 363  | 0     |
| ENSP00000364847 | MAGED1   | 363  | 0.001 |
| ENSP00000365435 | TNFRSF1B | 363  | 0.002 |
| ENSP00000365858 | GATA1    | 2    | 0.025 |
| ENSP00000366565 | VPS28    | 363  | 0.019 |
| ENSP00000367299 | VPS36    | 363  | 0.003 |
| ENSP00000368699 | ISG15    | 724  | 0.033 |
| ENSP00000368766 | ADRA1D   | 262  | 0.017 |
| ENSP00000369213 | DDX58    | 724  | 0.033 |
| ENSP00000369816 | SHBG     | 363  | 0.01  |
| ENSP00000370503 | CCM2     | 362  | 0.018 |
| ENSP00000376776 | DBH      | 366  | 0.009 |
| ENSP00000380280 | FGFR1    | 1798 | 0.001 |
| ENSP00000381607 | GSTP1    | 843  | 0.001 |
| ENSP00000382166 | CX3CR1   | 363  | 0     |
| ENSP00000382697 | ROCK1    | 363  | 0.001 |
| ENSP00000385021 | FANCL    | 363  | 0     |
| ENSP00000386717 | RPL31    | 1    | 0.005 |
| ENSP00000396439 | RING1    | 362  | 0.019 |
| ENSP00000401303 | SHC1     | 936  | 0.044 |
| ENSP00000410294 | FGFR2    | 1085 | 0     |
| ENSP00000412045 | TXNRD1   | 1    | 0.029 |
| ENSP00000413720 | CDKN1C   | 363  | 0     |
| ENSP00000415183 | MUC2     | 363  | 0.002 |

|                  |        |     |       |
|------------------|--------|-----|-------|
| ENSP000000415615 | CSNK2B | 362 | 0.037 |
| ENSP000000417404 | HFE    | 794 | 0.015 |
| ENSP000000419599 | DPH3   | 363 | 0     |
| ENSP000000420168 | GSTA2  | 20  | 0     |
